# Supplementary material for: Epidemiological Landscape of injuries Associated with Motor Traffic Accidents in Southern Tanzania
Source: Research Square preprint supplement (doi:10.21203/rs.3.rs-5830073/v1), 2025-01-20
Supplement: Supplementary file 1 [file cd08d5c4a67e16b63473ecbf.xlsx]

## Sheet: Sheet1
s/n	Date (dd/mm/yyyy)	Age (years)	Agecat	Sex	Place of residence (District)	Religion status	Ethnicity	Occupation status	Education level	Marital status	Anatomical site	Type of fracture	Affected side	Isolated femur fractor	Associated injuries/Injury occurred	Pattern of fracture	Cause of fracture	Type of vehicle	Type of motor vehicle injury	Victim group	Season of the year	FSF status
1	2023-01-14	15	≤17	Male	Lindi	Christian	Black	Student	Primary	Single					Chest injury		Road traffic injury	Motorcyle	Head-on collision	Passenger	Spring	0
2	2023-12-15	44	35-50	Female	Lindi	Christian	Black	Self-employed	Primary	Married	Proximal	Closed	Right	Yes	Head injury	Oblique	Road traffic injury	Motorcyle	Head-on collision	Passenger	Spring	0
3	2023-04-18	29	18-34	Male	Kilwa	Muslim	Black	Self-employed	Primary	Divorced	Distal	Closed	Right	Yes	Head injury	Oblique	Road traffic injury	Motorcyle	Rollover	Driver	Spring	0
4	2023-04-18	90	≥65	Male	Lindi	Muslim	Black	Self-employed	Didn't attend school	Married	Mid-shaft	Closed	Left	Yes	Musculoskeletal injury	Transverse	Road traffic injury	Motorcyle	Head-on collision	Passenger	Spring	1
5	2023-11-07	19	18-34	Female	Lindi	Christian	Black	Self-employed	Primary	Single					Visceral injury		Road traffic injury	Motorcyle	Head-on collision	Passenger	Spring	0
6	2023-06-28	41	35-50	Male	Kilwa	Christian	Black	Self-employed	Certificate	Married	Proximal	Closed	Left	Yes	Head injury	Oblique	Road traffic injury	Motorcyle	Head-on collision	Driver	Winter	0
7	2023-07-07	25	18-34	Male	Lindi	Muslim	Black	Self-employed	Primary	Married					Tibia fracture		Road traffic injury	Motorcyle	Head-on collision	Driver	Winter	0
8	2023-06-12	28	18-34	Female	Kilwa	Christian	Black	Self-employed	Primary	Married	Mid-shaft	Closed	Left	Yes	Musculoskeletal injury	Transverse	Road traffic injury	Motorcyle	Rollover	Passenger	Winter	1
9	2023-06-12	64	51-64	Male	Kilwa	Muslim	Black	Self-employed	Primary	Married	Mid-shaft	Closed	Left	Yes	Musculoskeletal injury	Transverse	Road traffic injury	Motorcyle	Head-on collision	Passenger	Summer	1
10	2023-08-16	54	51-64	Male	Lindi	Muslim	Black	Self-employed	Didn't attend school	Married	Mid-shaft	Closed	Left	Yes	Musculoskeletal injury	Oblique	Road traffic injury	Motorcyle	Rollover	Passenger	Summer	1
11	2023-08-02	49	35-50	Female	Kilwa	Muslim	Black	Self-employed	Didn't attend school	Married	Proximal	Closed	Left	Yes	Head injury	Transverse	Road traffic injury	Motorcyle	Rollover	Passenger	Summer	0
12	2023-08-20	13	≤17	Male	Lindi	Muslim	Black	Student	Primary	Single					Head injury		Road traffic injury	Motorcyle	Rollover	Passenger	Summer	0
13	2023-08-30	25	18-34	Male	Lindi	Muslim	Black	Self-employed	Primary	Married	Mid-shaft	Closed	Left	Yes	Head injury	Oblique	Road traffic injury	Motorcyle	Head-on collision	Driver	Summer	1
14	2023-09-07	46	35-50	Male	Lindi	Muslim	Black	Self-employed	Primary	Single					Tibia fracture		Road traffic injury	Motorcyle	Rollover	Passenger	Summer	0
15	2023-09-06	36	35-50	Male	Masasi	Muslim	Black	Self-employed	Primary	Divorced	Mid-shaft	Closed	Left	Yes	Musculoskeletal injury	Oblique	Road traffic injury	Motorcyle	Head-on collision	Driver	Summer	1
16	2023-09-11	6	≤17	Male	Kilwa	Muslim	Black	Student	Primary	Single					Visceral injury		Road traffic injury	Motorcyle	Head-on collision	Passenger	Summer	0
17	2023-09-14	12	≤17	Male	Lindi	Muslim	Black	Student	Primary	Single					Head injury		Road traffic injury	Motorcyle	Rollover	Passenger	Summer	0
18	2023-10-03	22	18-34	Male	Lindi	Muslim	Black	Self-employed	Primary	Single	Mid-shaft	Closed	Left	Yes	Head injury	Oblique	Road traffic injury	Motorcyle	Rollover	Driver	Summer	1
19	2023-10-03	40	35-50	Male	Kilwa	Muslim	Black	Self-employed	Primary	Married	Mid-shaft	Closed	Right	Yes	Musculoskeletal injury	Transverse	Road traffic injury	Motorcyle	Head-on collision	Passenger	Summer	1
20	2023-10-10	32	18-34	Male	Kilwa	Muslim	Black	Employed	Primary	Married	Mid-shaft	Closed	Right	Yes	Head injury	Oblique	Road traffic injury	Motorcyle	Head-on collision	Driver	Summer	1
21	2023-10-11	37	35-50	Male	Lindi	Muslim	Black	Self-employed	Primary	Single	Proximal	Closed	Left	Yes	Visceral injury	Transverse	Road traffic injury	Motorcyle	Head-on collision	Driver	Summer	0
22	2023-10-15	50	35-50	Female	Lindi	Muslim	Black	Self-employed	Primary	Married					Chest injury		Road traffic injury	Motorcyle	Head-on collision	Passenger	Summer	0
23	2023-10-19	49	35-50	Male	Kilwa	Muslim	Black	Self-employed	Primary	Single	Mid-shaft	Closed	Left	Yes	Musculoskeletal injury	Oblique	Road traffic injury	Motorcyle	Head-on collision	Passenger	Summer	1
24	2023-11-08	4	≤17	Male	Lindi	Muslim	Black	Student	Primary	Single					Visceral injury		Road traffic injury	Motorcyle	Rollover	Passenger	Summer	0
25	2023-11-19	40	35-50	Male	Lindi	Muslim	Black	Self-employed	Primary	Married	Mid-shaft	Closed	Right	Yes	Head injury	Oblique	Road traffic injury	Motorcyle	Head-on collision	Passenger	Summer	1
26	2023-11-28	4	≤17	Female	Lindi	Muslim	Black	Student	Primary	Single					Head injury		Road traffic injury	Motorcyle	Rollover	Passenger	Summer	0
27	2023-11-28	10	≤17	Male	Lindi	Muslim	Black	Student	Primary	Single					Head injury		Road traffic injury	Motorcyle	Rollover	Passenger	Summer	0
28	2023-12-01	50	35-50	Male	Lindi	Christian	Black	Employed	Primary	Married	Mid-shaft	Closed	Left	Yes	Musculoskeletal injury	Transverse	Road traffic injury	Motorcyle	Rollover	Passenger	Spring	1
29	2023-12-15	14	≤17	Male	Lindi	Muslim	Black	Student	Primary	Single					Head injury		Road traffic injury	Motorcyle	Head-on collision	Passenger	Spring	0
30	2023-12-23	23	18-34	Male	Lindi	Muslim	Black	Unemployed	Diploma	Single	Mid-shaft	Closed	Left	Yes	Head injury	Oblique	Road traffic injury	Motorcyle	Head-on collision	Driver	Spring	1
31	2023-12-28	5	≤17	Male	Kilwa	Muslim	Black	Student	Primary	Single					Head injury		Road traffic injury	Motorcyle	Head-on collision	Passenger	Spring	0
32	2023-12-29	27	18-34	Male	Lindi	Muslim	Black	Self-employed	Primary	Single	Mid-shaft	Closed	Left	Yes	Visceral injury	Oblique	Road traffic injury	Motorcyle	Rollover	Driver	Spring	1
33	2023-12-29	24	18-34	Male	Lindi	Muslim	Black	Self-employed	Secondary	Single	Mid-shaft	Closed	Left	Yes	Chest injury	Oblique	Road traffic injury	Motorcyle	Head-on collision	Driver	Spring	1
34	2023-12-30	27	18-34	Male	Kilwa	Muslim	Black	Self-employed	Primary	Married	Mid-shaft	Closed	Right	Yes	Chest injury	Oblique	Road traffic injury	Motorcyle	Rollover	Driver	Spring	1
35	2023-01-06	13	≤17	Female	Lindi	Muslim	Black	Student	Secondary	Single	Distal	Open	Right	Yes	Musculoskeletal injury	Transverse	Road traffic injury	Motorcyle	Head-on collision	Passenger	Spring	0
36	2023-01-10	35	35-50	Male	Masasi	Muslim	Black	Self-employed	Primary	Married	Distal	Open	Right	Yes	Head injury	Oblique	Road traffic injury	Motorcyle	Rollover	Driver	Spring	0
37	2023-02-20	18	18-34	Male	Mtwara	Christian	Black	Unemployed	Primary	Single					Head injury		Road traffic injury	Motorcyle	Head-on collision	Passenger	Spring	0
38	2023-02-28	24	18-34	Male	Nachingwea	Muslim	Black	Self-employed	Secondary	Single	Mid-shaft	Closed	Right	Yes	Head injury	Transverse	Road traffic injury	Motorcyle	Head-on collision	Passenger	Spring	1
39	2023-04-04	69	≥65	Female	Mtwara	Muslim	Black	Self-employed	Secondary	Married					Musculoskeletal injury		Road traffic injury	Motorcyle	Rollover	Passenger	Spring	0
40	2023-04-12	9	≤17	Male	Mtama	Muslim	Black	Student	Primary	Single					Head injury		Road traffic injury	Motorcyle	Head-on collision	Passenger	Spring	0
41	2023-04-12	16	≤17	Male	Liwale	Muslim	Black	Self-employed	Primary	Single	Distal	Closed	Right	Yes	Head injury	Spiral	Road traffic injury	Motorcyle	Head-on collision	Driver	Spring	0
42	2023-04-19	24	18-34	Female	Mtwara	Muslim	Black	Self-employed	Secondary	Single	Proximal	Closed	Right	Yes	Musculoskeletal injury	Comminuted	Road traffic injury	Motorcyle	Head-on collision	Passenger	Spring	0
43	2023-04-20	14	≤17	Male	Lindi	Muslim	Black	Student	Primary	Single					Head injury		Road traffic injury	Motorcyle	Head-on collision	Passenger	Spring	0
44	2023-04-25	65	≥65	Male	Kilwa	Muslim	Black	Self-employed	Secondary	Married					Musculoskeletal injury		Road traffic injury	Motorcyle	Rollover	Passenger	Spring	0
45	2023-05-23	80	≥65	Male	Mtwara	Muslim	Black	Self-employed	Secondary	Married					Head injury		Road traffic injury	Motorcyle	Head-on collision	Driver	Spring	0
46	2023-05-30	40	35-50	Male	Liwale	Muslim	Black	Employed	Diploma	Married	Distal	Open	Right	Yes	Head injury	Transverse	Road traffic injury	Motorcyle	Head-on collision	Driver	Spring	0
47	2023-06-13	46	35-50	Male	Lindi	Muslim	Black	Employed	Degree	Married	Proximal	Closed	Right	Yes	Head injury	Transverse	Road traffic injury	Motorcyle	Rollover	Driver	Winter	0
48	2023-07-06	70	≥65	Female	Lindi	Muslim	Black	Self-employed	Secondary	Married	Mid-shaft	Closed	Left	Yes	Musculoskeletal injury	Oblique	Road traffic injury	Motorcyle	Rollover	Pedestrian	Winter	1
49	2023-07-09	22	18-34	Male	Kilwa	Christian	Black	Self-employed	Primary	Single	Distal	Open	Left	Yes	Head injury	Transverse	Road traffic injury	Motorcyle	Head-on collision	Driver	Winter	0
50	2023-07-12	21	18-34	Male	Lindi	Muslim	Black	Self-employed	Primary	Single	Mid-shaft	Closed	Left	Yes	Head injury	Transverse	Road traffic injury	Motorcyle	Head-on collision	Passenger	Winter	1
51	2023-07-13	10	≤17	Female	Mtwara	Muslim	Black	Student	Primary	Single					Tibia fracture		Road traffic injury	Motorcyle	Head-on collision	Passenger	Winter	0
52	2023-07-25	65	≥65	Female	Lindi	Muslim	Black	Self-employed	Primary	Married					Musculoskeletal injury		Road traffic injury	Motorcyle	Rollover	Passenger	Winter	0
53	2023-08-04	32	18-34	Male	Lindi	Muslim	Black	Employed	Degree	Married	Mid-shaft	Closed	Left	Yes	Musculoskeletal injury	Transverse	Road traffic injury	Motorcyle	Rollover	Passenger	Summer	1
54	2023-08-11	28	18-34	Male	Kilwa	Muslim	Black	Self-employed	Primary	Single	Mid-shaft	Closed	Right	Yes	Head injury	Oblique	Road traffic injury	Motorcyle	Head-on collision	Driver	Summer	1
55	2023-05-18	8	≤17	Male	Kilwa	Muslim	Black	Student	Primary	Single					Chest injury		Road traffic injury	Motorcyle	Pedestrian	Pedestrian	Summer	0
56	2023-08-30	81	≥65	Female	Mtwara	Muslim	Black	Self-employed	Diploma	Married					Musculoskeletal injury		Road traffic injury	Motorcyle	Pedestrian	Pedestrian	Summer	0
57	2023-08-30	12	≤17	Female	Mtwara	Muslim	Black	Student	Primary	Single					Head injury		Road traffic injury	Motorcyle	Pedestrian	Pedestrian	Summer	0
58	2023-09-12	14	≤17	Male	Kilwa	Muslim	Black	Student	Primary	Single					Chest injury		Road traffic injury	Motorcyle	Rollover	Passenger	Summer	0
59	2023-09-26	12	≤17	Male	Masasi	Muslim	Black	Student	Primary	Single					Visceral injury		Road traffic injury	Motorcyle	Rollover	Passenger	Summer	0
60	2023-09-29	23	18-34	Male	Kilwa	Muslim	Black	Employed	Diploma	Single	Mid-shaft	Closed	Left	Yes	Musculoskeletal injury	Transverse	Road traffic injury	Motorcyle	Rollover	Passenger	Summer	1
61	2023-10-03	22	18-34	Male	Mtwara	Muslim	Black	Self-employed	Primary	Single	Mid-shaft	Closed	Right	Yes	Visceral injury	Transverse	Road traffic injury	Motorcyle	Rollover	Driver	Summer	1
62	2023-10-06	49	35-50	Male	Tandahimba	Muslim	Black	Self-employed	Secondary	Married	Mid-shaft	Open	Left	Yes	Chest injury	Transverse	Road traffic injury	Motorcyle	Rollover	Driver	Summer	1
63	2023-10-11	27	18-34	Male	Mtwara	Christian	Black	Self-employed	Primary	Married	Proximal	Open	Right	Yes	Musculoskeletal injury	Transverse	Road traffic injury	Motorcyle	Rollover	Driver	Summer	0
64	2023-10-16	13	≤17	Male	Mtama	Christian	Black	Student	Secondary	Single					Visceral injury		Road traffic injury	Motorcyle	Rollover	Passenger	Summer	0
65	2023-10-27	51	51-64	Male	Mtwara	Muslim	Black	Employed	Diploma	Married					Musculoskeletal injury		Road traffic injury	Motorcyle	Rollover	Driver	Summer	0
66	2023-10-31	60	51-64	Male	Lindi	Muslim	Black	Self-employed	Primary	Married					Musculoskeletal injury		Road traffic injury	Motorcyle	Rollover	Passenger	Summer	0
67	2023-11-10	64	51-64	Female	Lindi	Muslim	Black	Self-employed	Primary	Married	Distal	Closed	Right	Yes	Chest injury	Spiral	Road traffic injury	Motorcyle	Rollover	Passenger	Summer	0
68	2023-11-14	25	18-34	Male	Nanyamba	Muslim	Black	Self-employed	Primary	Single	Mid-shaft	Open	Left	Yes	Head injury	Transverse	Road traffic injury	Motorcyle	Head-on collision	Driver	Summer	1
69	2023-11-15	34	18-34	Male	Nanyamba	Muslim	Black	Self-employed	Primary	Married	Mid-shaft	Closed	Right	Yes	Head injury	Oblique	Road traffic injury	Motorcyle	Head-on collision	Driver	Summer	1
70	2023-09-22	18	18-34	Male	Nanyumbu	Muslim	Black	Student	Secondary	Single	Distal	Closed	Right	Yes	Head injury	Transverse	Road traffic injury	Motorcyle	Rollover	Passenger	Summer	0
71	2023-11-07	32	18-34	Female	Masasi	Muslim	Black	Self-employed	Primary	Single	Mid-shaft	Open	Right	Yes	Musculoskeletal injury	Oblique	Road traffic injury	Motorcyle	Head-on collision	Driver	Summer	1
72	2023-11-28	7	≤17	Male	Lindi	Muslim	Black	Student	Primary	Single	Mid-shaft	Closed	Left	Yes	Chest injury	Oblique	Road traffic injury	Motorcyle	Rollover	Passenger	Summer	1
73	2023-11-09	25	18-34	Female	Mtama	Christian	Black	Self-employed	Primary	Married	Mid-shaft	Closed	Right	Yes	Head injury	Transverse	Road traffic injury	Motorcyle	Rollover	Passenger	Summer	1
74	2023-12-01	32	18-34	Male	Tandahimba	Muslim	Black	Self-employed	Primary	Married	Mid-shaft	Closed	Right	Yes	Head injury	Oblique	Road traffic injury	Motorcyle	Head-on collision	Driver	Spring	1
75	2023-12-05	30	18-34	Male	Lindi	Muslim	Black	Self-employed	Primary	Married	Mid-shaft	Closed	Left	Yes	Head injury	Transverse	Road traffic injury	Motorcyle	Head-on collision	Driver	Spring	1
76	2023-12-19	67	≥65	Male	Ruangwa	Muslim	Black	Self-employed	Primary	Married	Mid-shaft	Closed	Left	Yes	Musculoskeletal injury	Oblique	Road traffic injury	Motorcyle	Head-on collision	Driver	Spring	1
77	2023-12-29	43	35-50	Male	Lindi	Muslim	Black	Self-employed	Primary	Married	Mid-shaft	Closed	Right	Yes	Head injury	Oblique	Road traffic injury	Motorcyle	Head-on collision	Driver	Spring	1
78	2023-01-05	45	35-50	Male	Nachingwea	Muslim	Black	Self-employed	Primary	Married	Proximal	Closed	Right	Yes	Head injury	Transverse	Road traffic injury	Motorcyle	Pedestrian	Pedestrian	Spring	0
79	2023-01-08	71	≥65	Female	Newala	Muslim	Black	Self-employed	Primary	Married					Tibia fracture		Road traffic injury	Motorcyle	Rollover	Passenger	Summer	0
80	2023-01-08	36	35-50	Male	Mtwara	Muslim	Black	Self-employed	Primary	Married	Distal	Closed	Left	No	Tibia fracture	Transverse	Road traffic injury	Motorcyle	Rollover	Passenger	Spring	0
81	2023-01-11	60	51-64	Female	Masasi	Muslim	Black	Self-employed	Primary	Married					Tibia fracture		Road traffic injury	Motorcyle	Pedestrian	Pedestrian	Spring	0
82	2023-01-12	13	≤17	Female	Tandahimba	Muslim	Black	Student	Primary	Single	Proximal	Closed	Right	Yes	No	Transverse	Road traffic injury	Motorcyle	Rollover	Pedestrian	Spring	0
83	2023-01-18	33	18-34	Female	Masasi	Muslim	Black	Employed	Diploma	Married	Proximal	Closed	Left	No	Head injury	Transverse	Road traffic injury	Motorcyle	Pedestrian	Pedestrian	Spring	0
84	2023-02-03	32	18-34	Male	Tunduru	Christian	Black	Self-employed	Secondary	Single	Proximal	Closed	Left	No	Tibia fracture	Transverse	Road traffic injury	Motorcyle	Rollover	Passenger	Spring	0
85	2023-02-03	27	18-34	Male	Masasi	Muslim	Black	Self-employed	Primary	Single	Proximal	Closed	Left	Yes	No	Transverse	Road traffic injury	Motorcyle	Rollover	Passenger	Spring	0
86	2023-02-05	29	18-34	Male	Tunduru	Muslim	Black	Self-employed	Primary	Single	Proximal	Closed	Left	Yes	No	Transverse	Road traffic injury	Motorcyle	Rollover	Passenger	Spring	0
87	2023-02-06	9	≤17	Female	Mtwara	Muslim	Black	Unemployed	Primary	Single					Tibia fracture		Road traffic injury	Motorcyle	Pedestrian	Pedestrian	Spring	0
88	2023-02-08	47	35-50	Female	Mtwara	Christian	Black	Employed	Secondary	Married					Head injury		Road traffic injury	Motorcyle	Pedestrian	Pedestrian	Spring	0
89	2023-02-10	62	51-64	Female	Lindi	Muslim	Black	Self-employed	Primary	Married					Head injury		Road traffic injury	Motorcyle	Rollover	Passenger	Spring	0
90	2023-02-14	24	18-34	Male	Mangaka	Muslim	Black	Self-employed	Secondary	Single	Proximal	Closed	Right	Yes	No	Transverse	Road traffic injury	Motorcyle	Rollover	Driver	Spring	0
91	2023-02-20	38	35-50	Female	Tandahimba	Muslim	Black	Self-employed	Primary	Married					Tibia fracture		Road traffic injury	Motorcyle	Rollover	Passenger	Spring	0
92	2023-03-02	65	≥65	Female	Masasi	Christian	Black	Self-employed	Secondary	Married					Head injury		Road traffic injury	Motorcyle	Rollover	Driver	Spring	0
93	2023-03-02	64	51-64	Female	Mtwara	Muslim	Black	Self-employed	Primary	Married					Tibia fracture		Road traffic injury	Motorcyle	Pedestrian	Pedestrian	Spring	0
94	2023-03-07	16	≤17	Male	Masasi	Muslim	Black	Student	Primary	Single	Proximal	Closed	Left	Yes	No	Transverse	Road traffic injury	Bicycle	Rollover	Driver	Summer	0
95	2023-03-08	28	18-34	Male	Masasi	Muslim	Black	Self-employed	Secondary	Single	Proximal	Closed	Left	No	Left upper limb fracture	Oblique	Road traffic injury	Minibus	Rollover	Passenger	Spring	0
96	2023-03-10	3	≤17	Female	Masasi	Muslim	Black	Student	Didn't attend school	Single	Mid-shaft	Open	Right	No	Tibia fracture	Transverse	Road traffic injury	Motorcyle	Rollover	Passenger	Summer	1
97	2023-03-09	54	51-64	Female	Masasi	Muslim	Black	Employed	Diploma	Married					Tibia fracture		Road traffic injury	Motorcyle	Pedestrian	Pedestrian	Summer	0
98	2023-03-10	42	35-50	Female	Masasi	Muslim	Black	Self-employed	Secondary	Married					Head injury		Road traffic injury	Bicycle	Rollover	Driver	Spring	0
99	2023-03-14	40	35-50	Male	Ruangwa	Muslim	Black	Self-employed	Secondary	Married					Radius fracture		Road traffic injury	Motorcyle	Rollover	Passenger	Spring	0
100	2023-04-04	40	35-50	Female	Mangaka	Muslim	Black	Self-employed	Primary	Married					Tibia fracture		Road traffic injury	Motorcyle	Pedestrian	Pedestrian	Summer	0
101	2023-04-10	22	18-34	Male	Nachingwea	Muslim	Black	Employed	Secondary	Married	Proximal	Closed	Right	No	Tibia fracture	Transverse	Road traffic injury	Motorcyle	Rollover	Driver	Summer	0
102	2023-04-15	69	≥65	Male	Tunduru	Muslim	Black	Self-employed	Secondary	Married					Tibia fracture		Road traffic injury	Motorcyle	Pedestrian	Pedestrian	Summer	0
103	2023-04-18	23	18-34	Male	Masasi	Muslim	Black	Self-employed	Secondary	Single	Proximal	Open	Right	Yes	No	Comminuted	Road traffic injury	Motorcyle	Rollover	Driver	Spring	0
104	2023-04-22	6	≤17	Male	Masasi	Muslim	Black	Student	Primary	Single	Proximal	Closed	Right	Yes	No	Oblique	Road traffic injury	Motorcyle	Rollover	Pedestrian	Summer	0
105	2023-05-10	47	35-50	Male	Kilwa	Christian	Black	Self-employed	Secondary	Married					Tibia fracture		Road traffic injury	Motorcyle	Rollover	Passenger	Summer	0
106	2023-05-14	72	≥65	Male	Masasi	Christian	Black	Self-employed	Primary	Married	Proximal	Closed	Left	Yes	No	Transverse	Road traffic injury	Motorcyle	Rollover	Passenger	Summer	0
107	2023-05-20	29	18-34	Male	Masasi	Muslim	Black	Self-employed	Primary	Married	Mid-shaft	Closed	Right	Yes	No	Transverse	Road traffic injury	Motorcyle	Rollover	Passenger	Summer	1
108	2023-05-24	76	≥65	Male	Masasi	Muslim	Black	Self-employed	Primary	Married	Proximal	Closed	Left	Yes	No	Spiral	Road traffic injury	Bicycle	Rollover	Driver	Summer	0
109	2023-06-02	30	18-34	Male	Mangaka	Muslim	Black	Self-employed	Secondary	Single	Distal	Open	Left	No	No	Oblique	Road traffic injury	Bajaj	Rollover	Driver	Summer	0
110	2023-06-04	54	51-64	Male	Lindi	Muslim	Black	Self-employed	Primary	Married	Proximal	Open	Right	Yes	No	Transverse	Road traffic injury	Motorcyle	Rollover	Passenger	Summer	0
111	2023-06-10	68	≥65	Male	Tandahimba	Muslim	Black	Self-employed	Primary	Married	Distal	Closed	Left	Yes	No	Comminuted	Road traffic injury	Motorcyle	Pedestrian	Pedestrian	Summer	0
112	2023-06-15	4	≤17	Male	Lindi	Muslim	Black	Student	Didn't attend school	Single	Proximal	Closed	Right	No	Tibia fracture	Transverse	Road traffic injury	Motorcyle	Pedestrian	Pedestrian	Summer	0
113	2023-06-20	20	18-34	Male	Tandahimba	Muslim	Black	Self-employed	Secondary	Single	Mid-shaft	Closed	Left	No	Chest injury	Oblique	Road traffic injury	Motorcyle	Head-on collision	Driver	Summer	1
114	2023-07-03	49	35-50	Male	Tunduru	Muslim	Black	Self-employed	Secondary	Married	Mid-shaft	Closed	Right	Yes	No	Oblique	Road traffic injury	Motorcyle	Pedestrian	Pedestrian	Summer	1
115	2023-07-10	51	51-64	Male	Masasi	Muslim	Black	Self-employed	Secondary	Married	Proximal	Closed	Left	No	No	Transverse	Road traffic injury	Motorcyle	Rollover	Driver	Summer	0
116	2023-07-15	53	51-64	Male	Masasi	Christian	Black	Self-employed	Secondary	Married	Mid-shaft	Closed	Right	Yes	No	Comminuted	Road traffic injury	Motorcyle	Pedestrian	Pedestrian	Summer	1
117	2023-07-22	40	35-50	Male	Tunduru	Muslim	Black	Student	Primary	Single	Proximal	Closed	Right	No	Tibia fracture	Oblique	Road traffic injury	Motorcyle	Pedestrian	Pedestrian	Summer	0
118	2023-08-10	29	18-34	Male	Tunduru	Muslim	Black	Self-employed	Secondary	Married	Proximal	Closed	Left	Yes	No	Transverse	Road traffic injury	Motorcyle	Pedestrian	Pedestrian	Summer	0
119	2023-08-15	2	≤17	Male	Masasi	Christian	Black	Student	Didn't attend school	Single	Proximal	Closed	Left	No	Head injury	Transverse	Road traffic injury	Motorcyle	Pedestrian	Pedestrian	Summer	0
120	2023-08-20	23	18-34	Male	Masasi	Christian	Black	Self-employed	Secondary	Single	Proximal	Closed	Right	No	Tibia fracture	Transverse	Road traffic injury	Motorcyle	Pedestrian	Pedestrian	Summer	0
121	2023-09-04	68	≥65	Male	Tandahimba	Muslim	Black	Self-employed	Primary	Married	Distal	Closed	Left	Yes	No	Comminuted	Road traffic injury	Motorcyle	Pedestrian	Pedestrian	Summer	0
122	2023-09-10	31	18-34	Male	Masasi	Muslim	Black	Self-employed	Secondary	Married	Proximal	Closed	Right	Yes	No	Oblique	Road traffic injury	Motorcyle	Pedestrian	Pedestrian	Summer	0
123	2023-09-15	59	51-64	Male	Tunduru	Muslim	Black	Self-employed	Secondary	Married	Mid-shaft	Closed	Right	No	Visceral injury	Comminuted	Road traffic injury	Minibus	Pedestrian	Pedestrian	Summer	1
124	2023-09-20	4	≤17	Male	Masasi	Muslim	Black	Student	Didn't attend school	Single	Mid-shaft	Closed	Right	Yes	No	Transverse	Road traffic injury	Motorcyle	Pedestrian	Pedestrian	Summer	1
125	2023-10-10	42	35-50	Male	Nachingwea	Christian	Black	Self-employed	Secondary	Married	Mid-shaft	Closed	Left	Yes	No	Transverse	Road traffic injury	Motorcyle	Rollover	Driver	Summer	1
126	2023-10-20	49	35-50	Male	Tunduru	Muslim	Black	Self-employed	Secondary	Married	Mid-shaft	Closed	Right	Yes	Head injury	Comminuted	Road traffic injury	Motorcyle	Rollover	Driver	Summer	1
127	2023-11-05	29	18-34	Male	Masasi	Muslim	Black	Self-employed	Secondary	Married	Mid-shaft	Closed	Left	Yes	No	Transverse	Road traffic injury	Motorcyle	Pedestrian	Pedestrian	Summer	1
128	2023-11-10	35	35-50	Male	Masasi	Christian	Black	Self-employed	Secondary	Married	Mid-shaft	Closed	Left	No	Chest injury	Transverse	Road traffic injury	Minibus	Head-on collision	Driver	Summer	1
129	2023-11-12	26	18-34	Male	Masasi	Muslim	Black	Self-employed	Primary	Married	Proximal	Open	Right	No	Head injury	Transverse	Road traffic injury	Motorcyle	Rollover	Passenger	Summer	0
130	2023-12-06	45	35-50	Male	Nachingwea	Muslim	Black	Self-employed	Primary	Married	Proximal	Closed	Right	No	Tibia fracture	Transverse	Road traffic injury	Motorcyle	Rollover	Driver	Spring	0
131	2023-12-16	65	≥65	Male	Mangaka	Muslim	Black	Self-employed	Secondary	Married	Distal	Open	Right	Yes	No	Transverse	Road traffic injury	Motorcyle	Rollover	Driver	Summer	0
132	2023-01-08	17	≤17	Male	Mtwara	Muslim	Black	Self-employed	Primary	Single	Mid-shaft	Closed	Left	Yes	Musculoskeletal injury	Transverse	Road traffic injury	Motorcyle	Pedestrian	Pedestrian	Summer	1
133	2023-01-15	23	18-34	Male	Mtwara	Muslim	Black	Unemployed	Primary	Single	Mid-shaft	Closed	Right	Yes	Musculoskeletal injury	Transverse	Road traffic injury	Motorcyle	Pedestrian	Pedestrian	Summer	1
134	2023-02-05	33	18-34	Female	Mtwara	Muslim	Black	Unemployed	Primary	Married					Musculoskeletal injury		Road traffic injury	Motorcyle	Rollover	Driver	Summer	0
135	2023-02-10	44	35-50	Female	Mtwara	Muslim	Black	Unemployed	Primary	Married					Musculoskeletal injury		Road traffic injury	Motorcyle	Rollover	Passenger	Summer	0
136	2023-03-16	19	18-34	Male	Mtwara	Muslim	Black	Unemployed	Primary	Single	Mid-shaft	Closed	Left	Yes	Musculoskeletal injury	Comminuted	Road traffic injury	Motorcyle	Head-on collision	Driver	Summer	1
137	2023-04-10	27	18-34	Female	Mtwara	Christian	Black	Self-employed	Secondary	Single					Musculoskeletal injury		Road traffic injury	Motorcyle	Rollover	Passenger	Spring	0
138	2023-05-12	36	35-50	Male	Mtwara	Muslim	Black	Self-employed	Secondary	Married	Mid-shaft	Closed	Left	Yes	Radius fracture	Oblique	Road traffic injury	Motorcyle	Pedestrian	Pedestrian	Summer	1
139	2023-06-06	52	51-64	Female	Mtwara	Muslim	Black	Self-employed	Secondary	Married	Mid-shaft	Closed	Left	Yes	Tibia fracture	Oblique	Road traffic injury	Motorcyle	Rollover	Driver	Summer	1
140	2023-06-10	71	≥65	Female	Mtwara	Muslim	Black	Unemployed	Primary	Married					Musculoskeletal injury		Road traffic injury	Motorcyle	Pedestrian	Pedestrian	Spring	0
141	2023-06-14	19	18-34	Male	Mtwara	Christian	Black	Student	Secondary	Single	Mid-shaft	Closed	Right	Yes	Musculoskeletal injury	Transverse	Road traffic injury	Motorcyle	Rollover	Driver	Summer	1
142	2023-07-10	34	18-34	Male	Mtwara	Christian	Black	Employed	Diploma	Married	Mid-shaft	Closed	Left	No	Radius fracture	Oblique	Road traffic injury	Motorcyle	Pedestrian	Pedestrian	Summer	1
143	2023-08-16	29	18-34	Male	Mtwara	Christian	Black	Employed	Degree	Married	Mid-shaft	Closed	Left	Yes	Musculoskeletal injury	Transverse	Road traffic injury	Motorcyle	Pedestrian	Pedestrian	Spring	1
144	2023-08-24	26	18-34	Male	Mtwara	Christian	Black	Self-employed	Secondary	Married	Mid-shaft	Closed	Left	Yes	Musculoskeletal injury	Transverse	Road traffic injury	Motorcyle	Pedestrian	Pedestrian	Summer	1
145	2023-09-10	67	≥65	Male	Mtwara	Christian	Black	Self-employed	Secondary	Married	Proximal	Closed	Right	Yes	Musculoskeletal injury	Comminuted	Road traffic injury	Motorcyle	Pedestrian	Pedestrian	Summer	0
146	2023-09-12	35	35-50	Male	Mtwara	Christian	Black	Employed	Degree	Married	Mid-shaft	Closed	Left	Yes	Musculoskeletal injury	Oblique	Road traffic injury	Motorcyle	Rollover	Passenger	Summer	1
147	2023-10-05	45	35-50	Male	Mtwara	Muslim	Black	Self-employed	Primary	Married	Mid-shaft	Closed	Left	Yes	Musculoskeletal injury	Oblique	Road traffic injury	Motorcyle	Pedestrian	Pedestrian	Spring	1
148	2023-11-10	19	18-34	Male	Mtwara	Christian	Black	Student	Certificate	Single	Mid-shaft	Closed	Right	Yes	Musculoskeletal injury	Transverse	Road traffic injury	Motorcyle	Pedestrian	Pedestrian	Summer	1
149	2023-11-14	30	18-34	Male	Mtwara	Muslim	Black	Self-employed	Secondary	Married	Distal	Closed	Right	Yes	Musculoskeletal injury	Transverse	Road traffic injury	Motorcyle	Rollover	Passenger	Summer	0
150	2023-12-07	37	35-50	Male	Mtwara	Christian	Black	Employed	Degree	Married	Mid-shaft	Closed	Left	Yes	Musculoskeletal injury	Oblique	Road traffic injury	Bajaj	Head-on collision	Passenger	Summer	1
151	2023-01-10	27	18-34	Male	Mtwara	Muslim	Black	Unemployed	Degree	Married	Distal	Open	Left	No	Radius fracture	Transverse	Road traffic injury	Motorcyle	Pedestrian	Pedestrian	Spring	0
152	2023-05-04	28	18-34	Male	Mtwara	Muslim	Black	Unemployed	Primary	Single	Mid-shaft	Closed	Left	Yes	Musculoskeletal injury	Transverse	Road traffic injury	Motorcyle	Pedestrian	Pedestrian	Summer	1
153	2023-09-07	31	18-34	Male	Mtwara	Christian	Black	Employed	Degree	Married	Distal	Open	Left	No	Tibia fracture	Transverse	Road traffic injury	Motorcyle	Rollover	Passenger	Summer	0
154	2023-11-07	36	35-50	Female	Mtwara	Christian	Black	Employed	Degree	Married					Musculoskeletal injury		Road traffic injury	Minibus	Rollover	Passenger	Summer	0
